# Supplementary figures and images for: Rapid preparation of robust polyaniline coating on an etched stainless steel wire for solid-phase microextraction of dissolved bisphenol A in drinking water and beverages
Source: Royal Society of Chemistry journal article supplement (doi:10.1039/c4ay00182f), 2014-01-01

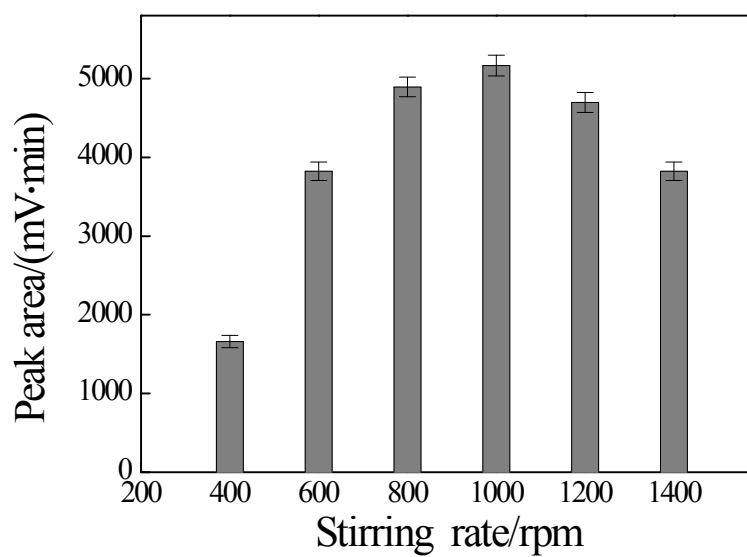

**Fig. S1** Effect of stirring rate on the extraction efficiency of BPA.

Supplement: c4ay00182f1.pdf [file c4ay00182f1.pdf]

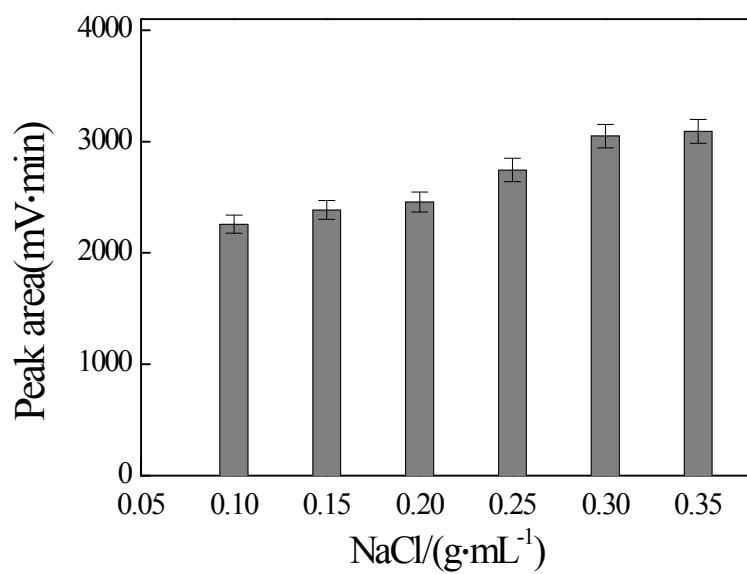

**Fig. S2** Effect of NaCl concentration on the extraction efficiency of BPA.

Supplement: c4ay00182f2.pdf [file c4ay00182f2.pdf]
